# Supplementary material
Source: PubMed Central journal article supplement (PMC3098138)
Supplement: NIHMS286550-supplement-Supp_Fig_S1.pdf [file NIHMS286550-supplement-Supp_Fig_S1.pdf]

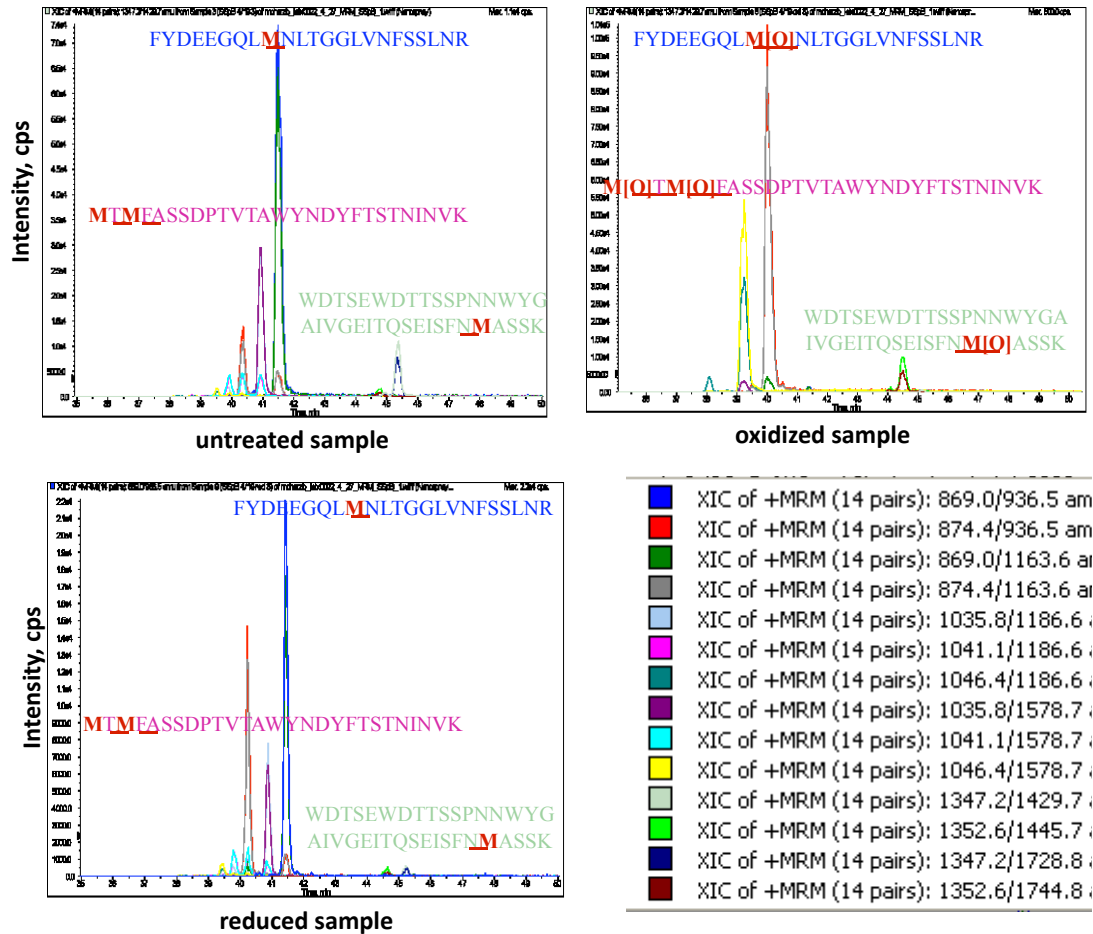

**Fig. S1. Mass spectra of untreated, oxidized and MsrA-treated SspB central region peptides from the protein fragments.** MASS-SPEC analysis identifies the oxidized and reduced met residues in peptides in untreated, H<sub>2</sub>O<sub>2</sub>-oxidized, MsrA-reduced samples. Colors correspond to sequences shown in Fig. 7.
